# Supplementary material for: Temporal and sex-dependent gene expression patterns in a renal ischemia–reperfusion injury and recovery pig model
Source: PubMed Central journal article supplement (PMC9051203; doi:10.1038/s41598-022-10352-3), 2022-04-28
Supplement: 41598_2022_10352_MOESM1_ESM.pdf [file 41598_2022_10352_MOESM1_ESM.pdf]

## SUPPLEMENTARY INFORMATION

# Temporal and sex-dependent gene expression patterns in a renal ischemia-reperfusion injury and recovery pig model

Stéphane Nemours<sup>1</sup>, Luis Castro<sup>2</sup>, Didac Ribatallada-Soriano<sup>1</sup>, Maria Eugenia Semidey<sup>3</sup>, Miguel Aranda<sup>1</sup>, Marina Ferrer<sup>4</sup>, Alex Sanchez<sup>5,6</sup>, Joan Morote<sup>2</sup>, Gerard Cantero-Recasens<sup>1</sup>, Anna Meseguer<sup>1,7,8,#</sup>

Affiliations: <sup>1</sup>Renal Physiopathology Group, CIBBIM-Nanomedicine, Vall d'Hebron Research Institute, Barcelona, Spain. <sup>2</sup>Biomedical Research in Urology Group, Vall d'Hebron Research Institute, Barcelona, Spain. <sup>3</sup>Department of Pathology, Hospital Vall d'Hebron, Barcelona, Spain. <sup>4</sup>Rodent Platform, Vall d'Hebron Research Institute, Universitat Autònoma de Barcelona, Barcelona, Spain. <sup>5</sup>Unitat d'Estadística i Bioinformàtica, (UEB), Vall d'Hebron Research Institute, Barcelona, Spain. <sup>6</sup>Department of Genetics, Microbiology and Statistics. Universitat de Barcelona, Barcelona, Spain, <sup>7</sup>Departament de Bioquímica i Biologia Molecular, Unitat de Bioquímica de Medicina, Universitat Autònoma de Barcelona, Bellaterra; Spain. <sup>8</sup>Red de Investigación Renal (REDINREN), Instituto Carlos III-FEDER, Madrid, Spain.

# Correspondence to:

Anna Meseguer: [ana.meseguer@vhir.org](mailto:ana.meseguer@vhir.org)

Renal Physiopathology Group, CIBBIM-Nanomedicine, Vall d'Hebron Research Institute,  
Passeig Vall d'Hebron 119-129, 08035 Barcelona, Spain.

Telephone number: +34 934894070; fax number: +34 934894015;

## **INDEX**

### **Supplementary figures**

|                             |        |
|-----------------------------|--------|
| Supplementary figure 1..... | Page 3 |
| Supplementary figure 2..... | Page 4 |
| Supplementary figure 3..... | Page 5 |

### **Supplementary tables**

|                             |         |
|-----------------------------|---------|
| Supplementary table 1.....  | Page 6  |
| Supplementary table 2.....  | Page 7  |
| Supplementary table 3.....  | Page 8  |
| Supplementary table 4.....  | Page 9  |
| Supplementary table 5.....  | Page 10 |
| Supplementary table 6.....  | Page 11 |
| Supplementary table 7.....  | Page 12 |
| Supplementary table 8.....  | Page 13 |
| Supplementary table 9.....  | Page 14 |
| Supplementary table 10..... | Page 15 |
| Supplementary table 11..... | Page 16 |

## SUPPLEMENTARY FIGURE 1

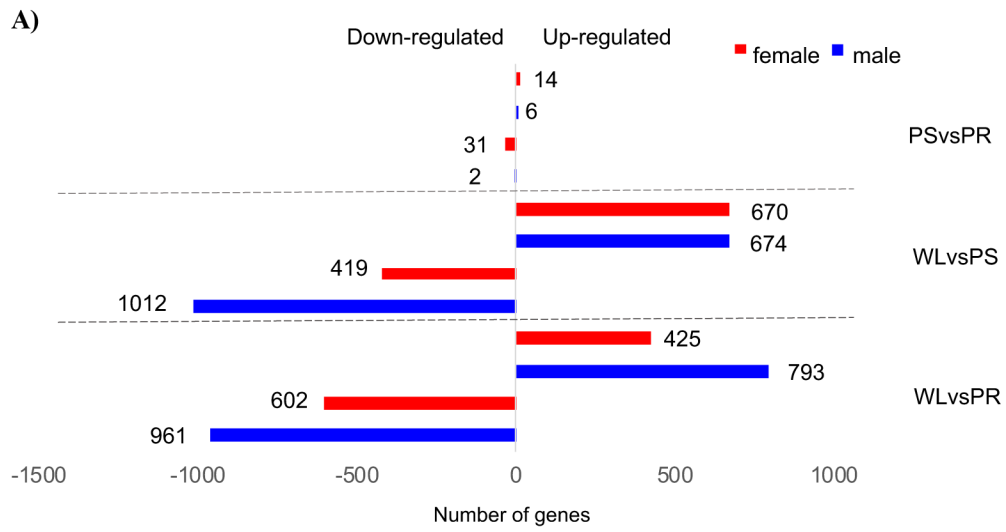

**Supplementary figure 1.** Number of genes differentially expressed throughout renal IRI in porcine kidney males and females at different time points (adjusted p-value  $\leq 0.25$  were considered. (PR: pre-ischemia; PS: post-ischemia; WL: one week later).

## SUPPLEMENTARY FIGURE 2

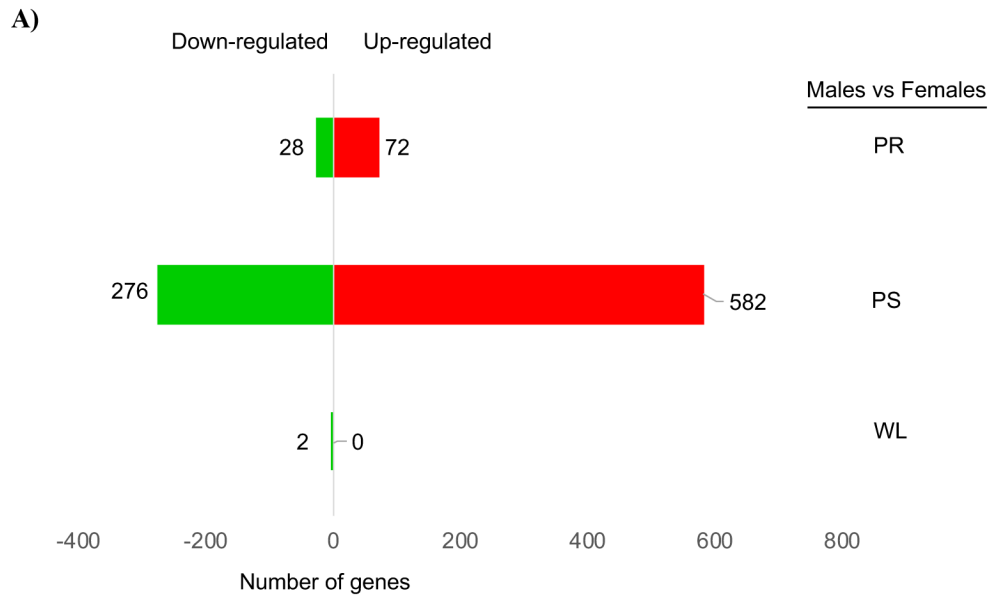

**Supplementary figure 2.** Number of genes differentially expressed throughout renal IRI in porcine kidney between males and females at the same time point (adjusted p-value  $\leq 0.25$  were considered. (PR: pre-ischemia; PS: post-ischemia; WL: one week later).

### SUPPLEMENTARY FIGURE 3

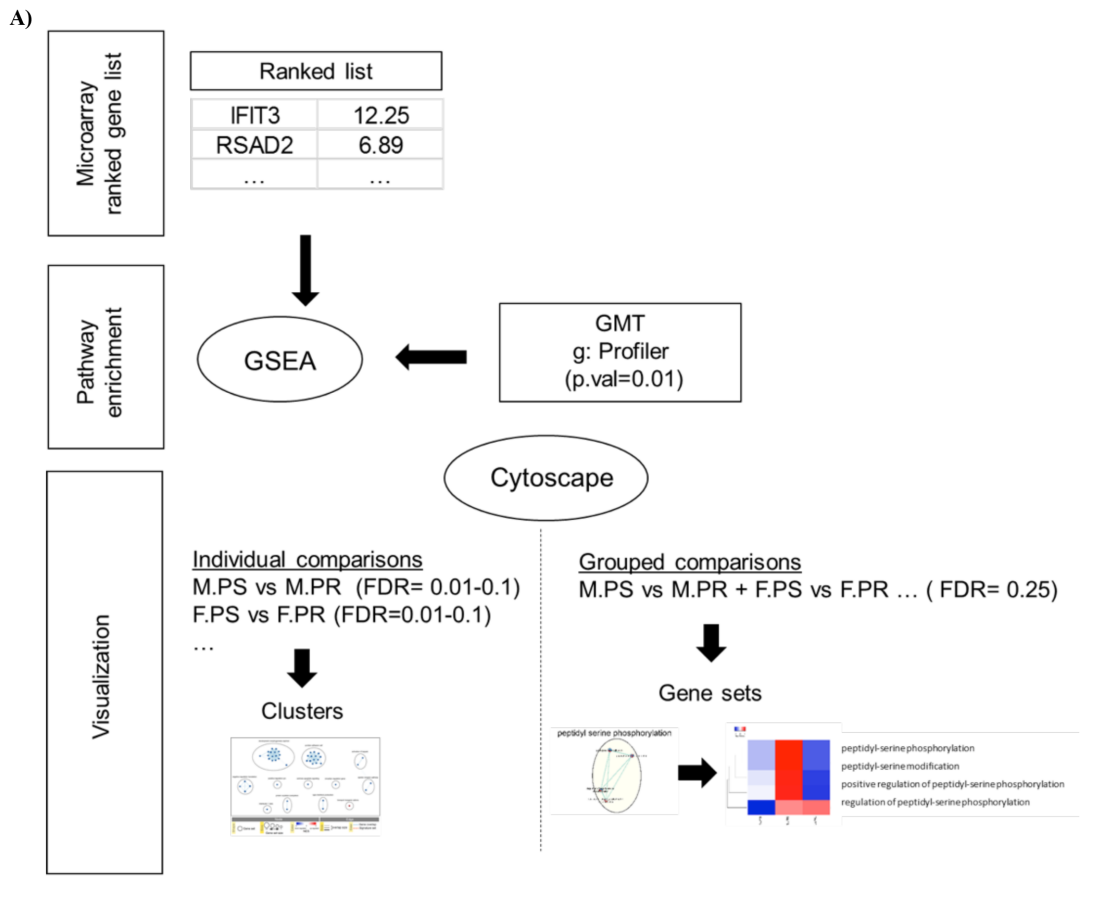

**Supplementary figure 3. Protocol overview of GSEA analysis.** Gene lists derived from diverse omics data undergo pathway enrichment analysis, using GSEA, to identify pathways that are enriched in the experiment. Pathway enrichment analysis results are visualized and interpreted in Cytoscape using its EnrichmentMap, AutoAnnotate, WordCloud and clusterMaker2 applications.

**SUPPLEMENTARY TABLE 1**

| Time point | SCr (mg/dl)      |             |                  |             | BUN (mg/dl)      |         |                  |         |
|------------|------------------|-------------|------------------|-------------|------------------|---------|------------------|---------|
|            | Males            |             | Females          |             | Males            |         | Females          |         |
|            | Individual value | mean        | Individual value | mean        | Individual value | mean    | Individual value | mean    |
| PR         | 0.79             | 1.14 ± 0.32 | 1.01             | 1.14 ± 0.31 | 21               | 18 ± 6  | 6                | 15 ± 11 |
|            | 1.11             |             | 1.32             |             | 14               |         | 25               |         |
|            | 1.24             |             | 1.26             |             | 24               |         | 26               |         |
|            | 1.32             |             | 0.82             |             | 15               |         | 6                |         |
|            | 1.23             |             | 1.27             |             | 17               |         | 13               |         |
| PS         | 1.45             | 1.69 ± 0.46 | 1.37             | 1.71 ± 0.58 | 31               | 21 ± 9  | 8                | 19 ± 14 |
|            | 1.67             |             | 2.28             |             | 16               |         | 32               |         |
|            | 1.78             |             | 1.91             |             | 24               |         | 32               |         |
|            | 1.89             |             | 1.28             |             | 17               |         | 7                |         |
|            | 1.65             |             | 1.73             |             | 18               |         | 15               |         |
| 1d         | 3.04             | 2.97 ± 0.86 | 2.73             | 3.36 ± 1.17 | 67               | 55 ± 16 | 46               | 58 ± 22 |
|            | 2.65             |             | 4.46             |             | 47               |         | 78               |         |
|            | 3.61             |             | 3.84             |             | 58               |         | 70               |         |
|            | 2.7              |             | 2.23             |             | 47               |         | 44               |         |
|            | 2.84             |             | 3.53             |             | 54               |         | 53               |         |
| 3d         | 1.75             | 1.8 ± 0.60  | 1.6              | 2.17 ± 0.65 | 30               | 27 ± 13 | 26               | 35 ± 14 |
|            | 1.68             |             | 2.78             |             | 20               |         | 51               |         |
|            | 2.28             |             | 2.33             |             | 41               |         | 39               |         |
|            | 1.82             |             | 1.55             |             | 26               |         | 28               |         |
|            | 1.47             |             | 2.61             |             | 16               |         | 33               |         |
| WL         | 1.26             | 1.62 ± 0.41 | 1.42             | 1.79 ± 0.51 | 19               | 27 ± 8  | 22               | 25 ± 9  |
|            | 1.84             |             | 2.08             |             | 35               |         | 27               |         |
|            | 1.61             |             | 1.83             |             | 26               |         | 31               |         |
|            | 1.62             |             | -                |             | 23               |         | -                |         |
|            | 1.77             |             | 1.84             |             | 30               |         | 21               |         |

**Table S1.** Serum creatinine and BUN levels in male and female pigs throughout the experiment.

## **SUPPLEMENTARY TABLE 2**

| Position number | up-regulated                                                                      |        | down-regulated                                        |         |
|-----------------|-----------------------------------------------------------------------------------|--------|-------------------------------------------------------|---------|
|                 | Name                                                                              | NES    | Name                                                  | NES     |
| 1               | regulation of transcription from RNA polymerase II promoter in response to stress | 1.8810 | positive regulation of endothelial cell proliferation | -1.9366 |
| 2               | regulation of DNA-templated transcription in response to stress                   | 1.8261 | regulation of endothelial cell proliferation          | -1.9203 |
| 3               | cellular response to reactive oxygen species                                      | 1.8227 | regulation of protein processing                      | -1.9193 |
| 4               | cellular response to oxidative stress                                             | 1.8098 | regulation of protein maturation                      | -1.9115 |
| 5               | macromolecule methylation                                                         | 1.6995 | Regulation of Complement cascade                      | -1.8253 |
| 6               | regulation of anion transport                                                     | 1.6212 | phagocytosis, engulfment                              | -1.8152 |
| 7               | protein methylation                                                               | 1.6147 | glial cell differentiation                            | -1.8119 |
| 8               | protein alkylation                                                                | 1.6118 | regulation of protein tyrosine kinase activity        | -1.8024 |
| 9               | stem cell population maintenance                                                  | 1.5914 | protein activation cascade                            | -1.7919 |
| 10              | maintenance of cell number                                                        | 1.5812 | complement cascade                                    | -1.7897 |

**Table S2.** Top 10 up- and down-regulated gene sets and NES in GSEA analysis for FPS vs FPR comparison.

### **SUPPLEMENTARY TABLE 3**

| Position number | up-regulated Name                                                   | NES    | down-regulated Name                         | NES     |
|-----------------|---------------------------------------------------------------------|--------|---------------------------------------------|---------|
| 1               | transport of inorganic cations/anions and amino acids/oligopeptides | 2.0897 | kidney epithelium development               | -2.2511 |
| 2               | drug transmembrane transport                                        | 1.9381 | regulation of translation                   | -2.2027 |
| 3               | the citric acid (TCA) cycle and respiratory electron transport      | 1.9151 | peptide biosynthetic process                | -2.1876 |
| 4               | complement activation                                               | 1.8511 | translation                                 | -2.1730 |
| 5               | protein folding                                                     | 1.8086 | cell junction assembly                      | -2.1662 |
| 6               | import across plasma membrane                                       | 1.8068 | positive regulation of cell-matrix adhesion | -2.1179 |
| 7               | SLC-mediated transmembrane transport                                | 1.7834 | focal adhesion assembly                     | -2.1149 |
| 8               | neutrophil activation involved in immune response                   | 1.7833 | cell-substrate adherens junction assembly   | -2.0967 |
| 9               | regulation of humoral immune response                               | 1.7830 | negative regulation of translation          | -2.0765 |
| 10              | amino acid transmembrane transport                                  | 1.7809 | adherens junction assembly                  | -2.0650 |

**Table S3.** Top 10 up- and down-regulated gene sets and NES in GSEA analysis for FWL vs FPS comparison.



#### **SUPPLEMENTARY TABLE 4**

| Position number | up-regulated                                                        |        | down-regulated                                 |         |
|-----------------|---------------------------------------------------------------------|--------|------------------------------------------------|---------|
|                 | Name                                                                | NES    | Name                                           | NES     |
| 1               | amino acid transmembrane transport                                  | 2.1240 | positive regulation of cell-substrate adhesion | -2.1642 |
| 2               | transport of inorganic cations/anions and amino acids/oligopeptides | 2.0135 | regulation of cell-matrix adhesion             | -2.0960 |
| 3               | transition metal ion transport                                      | 1.9820 | positive regulation of growth                  | -2.0871 |
| 4               | carboxylic acid transmembrane transport                             | 1.9330 | regulation of cell-substrate adhesion          | -2.0625 |
| 5               | organic acid transmembrane transport                                | 1.9092 | positive regulation of cell-matrix adhesion    | -2.0569 |
| 6               | drug transmembrane transport                                        | 1.9085 | cell-matrix adhesion                           | -2.0351 |
| 7               | amino acid transport                                                | 1.8928 | antigen receptor-mediated signaling pathway    | -2.0315 |
| 8               | electron transport chain                                            | 1.8813 | cell-substrate adhesion                        | -2.0033 |
| 9               | L-amino acid transport                                              | 1.8500 | rho protein signal transduction                | -2.0028 |
| 10              | SLC-mediated transmembrane transport                                | 1.8089 | cell junction organization                     | -1.9762 |

**Table S4.** Top 10 up- and down-regulated gene sets and NES in GSEA analysis for FWL vs FPR comparison.

## **SUPPLEMENTARY TABLE 5**

| Position number | up-regulated                                |        | down-regulated                                  |         |
|-----------------|---------------------------------------------|--------|-------------------------------------------------|---------|
|                 | Name                                        | NES    | Name                                            | NES     |
| 1               | positive regulation of neuron death         | 2.0422 | regulation of cell-matrix adhesion              | -2.0901 |
| 2               | regulation of mitotic nuclear division      | 1.9928 | cell-matrix adhesion                            | -1.9135 |
| 3               | protein folding                             | 1.9418 | focal adhesion assembly                         | -1.8737 |
| 4               | cellular responses to external stimuli      | 1.9348 | negative regulation of cell-substrate adhesion  | -1.8620 |
| 5               | protein targeting                           | 1.9206 | cell-substrate adherens junction assembly       | -1.8569 |
| 6               | response to topologically incorrect protein | 1.8758 | adherens junction assembly                      | -1.8285 |
| 7               | vacuolar transport                          | 1.8584 | cell-substrate junction assembly                | -1.8211 |
| 8               | response to unfolded protein                | 1.8534 | positive regulation of cell-matrix adhesion     | -1.7913 |
| 9               | carboxylic acid transmembrane transport     | 1.8473 | positive regulation of interleukin-6 production | -1.7909 |
| 10              | coenzyme metabolic process                  | 1.8385 | mast cell activation                            | -1.7906 |

**Table S5.** Top 10 up- and down-regulated gene sets and NES in GSEA analysis for MPS vs MPR comparison.

## **SUPPLEMENTARY TABLE 6**

| Position number | up-regulated                               |        | down-regulated                              |         |
|-----------------|--------------------------------------------|--------|---------------------------------------------|---------|
|                 | Name                                       | NES    | Name                                        | NES     |
| 1               | microtubule cytoskeleton organization      | 2.2836 | defense response to virus                   | -2.6040 |
| 2               | mitotic prometaphase                       | 2.0927 | defense response to other organism          | -2.5883 |
| 3               | nuclear division                           | 1.9101 | response to virus                           | -2.4996 |
| 4               | microtubule-based process                  | 1.8978 | response to type I interferon               | -2.3965 |
| 5               | outflow tract morphogenesis                | 1.8861 | Interferon Signaling                        | -2.3915 |
| 6               | G2/M transition of mitotic cell cycle      | 1.8435 | interferon-gamma-mediated signaling pathway | -2.3862 |
| 7               | Cilium Assembly                            | 1.8357 | cytokine Signaling in Immune system         | -2.3738 |
| 8               | cytokinesis                                | 1.8142 | cellular response to type I interferon      | -2.3737 |
| 9               | meiotic cell cycle                         | 1.8006 | type I interferon signaling pathway         | -2.3710 |
| 10              | microtubule organizing center organization | 1.7707 | interferon alpha/beta signaling             | -2.3660 |

**Table S6.** Top 10 up- and down-regulated gene sets and NES in GSEA analysis for MWL vs MPS comparison.

## **SUPPLEMENTARY TABLE 7**

| Position number | up-regulated                                        |        | down-regulated                              |         |
|-----------------|-----------------------------------------------------|--------|---------------------------------------------|---------|
|                 | Name                                                | NES    | Name                                        | NES     |
| 1               | microtubule cytoskeleton organization               | 2.1985 | defense response to other organism          | -2.7435 |
| 2               | mitotic prometaphase                                | 2.0865 | defense response to virus                   | -2.6592 |
| 3               | microtubule organizing center organization          | 2.0785 | response to virus                           | -2.6044 |
| 4               | microtubule-based process                           | 2.0765 | interferon signaling                        | -2.5913 |
| 5               | G2/M transition of mitotic cell cycle               | 1.9769 | interferon alpha/beta signaling             | -2.5609 |
| 6               | nuclear division                                    | 1.9130 | cytokine signaling in immune system         | -2.5028 |
| 7               | cell cycle, mitotic                                 | 1.8798 | interferon-gamma-mediated signaling pathway | -2.4957 |
| 8               | cytokinesis                                         | 1.8634 | regulation of type I interferon production  | -2.4658 |
| 9               | cell cycle G2/M phase transition                    | 1.8268 | innate immune response                      | -2.4328 |
| 10              | regulation of microtubule cytoskeleton organization | 1.8111 | type I interferon production                | -2.4251 |

**Table S7.** Top 10 up- and down-regulated gene sets and NES in GSEA analysis for MWL vs MPR comparison.

### **SUPPLEMENTARY TABLE 8**

| Position number | up-regulated                           |        | down-regulated                     |         |
|-----------------|----------------------------------------|--------|------------------------------------|---------|
|                 | Name                                   | NES    | Name                               | NES     |
| 1               | cytokine signaling in immune system    | 3.1556 | ventricular septum development     | -1.8453 |
| 2               | defense response to other organism     | 3.1034 | keratinocyte differentiation       | -1.7788 |
| 3               | defense response to virus              | 3.0129 | cardiac septum morphogenesis       | -1.7693 |
| 4               | innate immune response                 | 3.0062 | cardiac septum development         | -1.7458 |
| 5               | Interferon Signaling                   | 3.0007 | outflow tract morphogenesis        | -1.7246 |
| 6               | response to virus                      | 2.9072 | glomerulus development             | -1.7167 |
| 7               | cytokine-mediated signaling pathway    | 2.8606 | cardiac ventricle development      | -1.6914 |
| 8               | cellular response to type I interferon | 2.8605 | detection of stimulus              | -1.6709 |
| 9               | type I interferon signaling pathway    | 2.8415 | brain development                  | -1.6628 |
| 10              | response to biotic stimulus            | 2.8282 | regulation of synapse organization | -1.6598 |

**Table S8.** Top 10 up- and down-regulated gene sets and NES in GSEA analysis for MPR vs FPR comparison.

## SUPPLEMENTARY TABLE 9

| Position number | up-regulated                        |        | down-regulated                                                     |        |
|-----------------|-------------------------------------|--------|--------------------------------------------------------------------|--------|
|                 | Name                                | NES    | Name                                                               | NES    |
| 1               | innate immune response              | 2.6989 | defense response to bacterium                                      | 1.7816 |
| 2               | response to virus                   | 2.6627 | signal transduction by protein phosphorylation                     | 1.7820 |
| 3               | Interferon Signaling                | 2.6063 | antigen receptor-mediated signaling pathway                        | 1.7830 |
| 4               | defense response to virus           | 2.5981 | leukocyte migration                                                | 1.7831 |
| 5               | cytokine signaling in immune system | 2.5912 | immune response-regulating cell surface receptor signaling pathway | 1.7876 |
| 6               | defense response to other organism  | 2.5810 | zymogen activation                                                 | 1.7897 |
| 7               | cytokine-mediated signaling pathway | 2.5280 | alpha-beta T cell differentiation                                  | 1.7904 |
| 8               | response to interferon-gamma        | 2.4697 | negative regulation of phosphate metabolic process                 | 1.7904 |
| 9               | type I interferon signaling pathway | 2.4601 | negative regulation of phosphorus metabolic process                | 1.7922 |
| 10              | Interferon gamma signaling          | 2.4419 | regulation of protein localization                                 | 1.7928 |

**Table S9.** Top 10 up- and down-regulated gene sets and NES in GSEA analysis for MPS vs FPS comparison.

## **SUPPLEMENTARY TABLE 10**

| Position number | up-regulated                                                       |        | down-regulated                        |         |
|-----------------|--------------------------------------------------------------------|--------|---------------------------------------|---------|
|                 | Name                                                               | NES    | Name                                  | NES     |
| 1               | antigen receptor-mediated signaling pathway                        | 2.5851 | carboxylic acid catabolic process     | -2.3959 |
| 2               | immune response-activating cell surface receptor signaling pathway | 2.5808 | organic acid catabolic process        | -2.3600 |
| 3               | B cell activation                                                  | 2.3594 | cellular amino acid metabolic process | -2.2771 |
| 4               | B cell proliferation                                               | 2.3559 | SLC-mediated transmembrane transport  | -2.2678 |
| 5               | Signaling by Interleukins                                          | 2.3212 | oxidation-reduction process           | -2.2151 |
| 6               | rho GTPase cycle                                                   | 2.2947 | cellular amino acid catabolic process | -2.2092 |
| 7               | regulation of small GTPase mediated signal transduction            | 2.2760 | alpha-amino acid metabolic process    | -2.2010 |
| 8               | positive regulation of cell cycle process                          | 2.2602 | monocarboxylic acid catabolic process | -2.1616 |
| 9               | microtubule cytoskeleton organization                              | 2.2306 | sodium ion transport                  | -2.1371 |
| 10              | T cell receptor signaling pathway                                  | 2.2300 | fatty acid metabolic process          | -2.1338 |

**Table S10.** Top 10 up- and down-regulated gene sets and NES in GSEA analysis for MWL vs FWL comparison.

## SUPPLEMENTARY TABLE 11

| Sample | Sex | Age (yrs) | Tumor type   | Cardiovascular pathology                                                              | Renal pathology           | Diabetes | Others                            |
|--------|-----|-----------|--------------|---------------------------------------------------------------------------------------|---------------------------|----------|-----------------------------------|
| 1      | M   | 36        | ccRCC        | n.a.                                                                                  | n.a.                      | n.a.     | n.a.                              |
| 2      | M   | 40        | ccRCC        | Dyslipidemia                                                                          |                           | NO       | Glaucoma                          |
| 3      | M   | 56        | ccRCC        |                                                                                       |                           | NO       | Leukocytic vasculitis             |
| 4      | M   | 66        | Lung cancer* | n.a.                                                                                  | n.a.                      | n.a.     | n.a.                              |
| 5      | M   | 69        | CRCC         | n.a.                                                                                  | n.a.                      | n.a.     | n.a.                              |
| 6      | M   | 70        | ccRCC        | n.a.                                                                                  | n.a.                      | n.a.     | n.a.                              |
| 7      | M   | 70        | ccRCC        | Atrial fibrillation, heart failure, stroke                                            | CKD                       | NO       | Former smoker                     |
| 8      | M   | 76        | ccRCC        | n.a.                                                                                  | n.a.                      | n.a.     | n.a.                              |
| 9      | M   | 80        | ccRCC        | n.a.                                                                                  | n.a.                      | n.a.     | n.a.                              |
| 10     | M   | Unknown   | ccRCC/PRCC   | Ischemic heart disease, arterial hypertension                                         | Polycystic kidney disease | NO       | Former smoker                     |
| 11     | F   | 53        | ccRCC        | n.a.                                                                                  | n.a.                      | n.a.     | n.a.                              |
| 12     | F   | 53        | ccRCC        | High blood pressure, dyslipidemia                                                     |                           | NO       | Goiter                            |
| 13     | F   | 54        | ccRCC        | High blood pressure                                                                   |                           | NO       | Goiter, cholecystectomy           |
| 14     | F   | 63        | ccRCC        | n.a.                                                                                  | n.a.                      | n.a.     | n.a.                              |
| 15     | F   | 65        | CRCC         | High blood pressure, dyslipidemia, ischemic cardiomyopathy, peripheral artery disease | CKD                       | NO       | Psoriasis                         |
| 16     | F   | 67        | ccRCC        | High blood pressure, ischemic stroke                                                  |                           | NO       | Asthma, brain meningioma          |
| 17     | F   | 68        | ccRCC        | n.a.                                                                                  | n.a.                      | n.a.     | n.a.                              |
| 18     | F   | 68        | ccRCC        | n.a.                                                                                  | n.a.                      | n.a.     | n.a.                              |
| 19     | F   | 83        | ccRCC        | High blood pressure, atrial fibrillation                                              |                           | NO       | Cholecystectomy, hemorrhoidectomy |

M, male; F, female; ccRCC: clear cell renal cell carcinoma; CRCC: chromophobe cell carcinoma; PRCC: papillary renal cell carcinoma, CKD: Chronic Kidney Disease, n.a.: not available  
\*Lung carcinoma with metastase to kidney

**Table S11.** Patients' clinical data.
